# Supplementary material
Source: MDPI journal article supplement (https://www.mdpi.com/2073-4344/13/11/1400)
Supplement: s1 [file s1 › catalysts-2655176-supplementary.pdf]

# Supplementary materials

## Ce<sub>1-x</sub>Sn<sub>x</sub>O<sub>2</sub> Catalysts Prepared with Combustion Method for Catalytic Combustion of Ethyl Acetate

Yue Jiang,<sup>a</sup> Qing Wang<sup>a</sup> and Jing Xu,<sup>a</sup> Shaohong Zang,<sup>a</sup> Liqiao Chen,<sup>a</sup> Luhui Wang,<sup>b</sup> Liuye Mo<sup>a</sup>

<sup>a</sup>National Engineering Research Center for Marine Aquaculture, Zhejiang Ocean University Zhoushan 316022, PR China

<sup>b</sup>School of Petroleum Chemical Engineering & Environment, Zhejiang Ocean University Zhoushan 316022, PR China

\* Correspondence: [liuyemo@zjou.edu.cn](mailto:liuyemo@zjou.edu.cn)

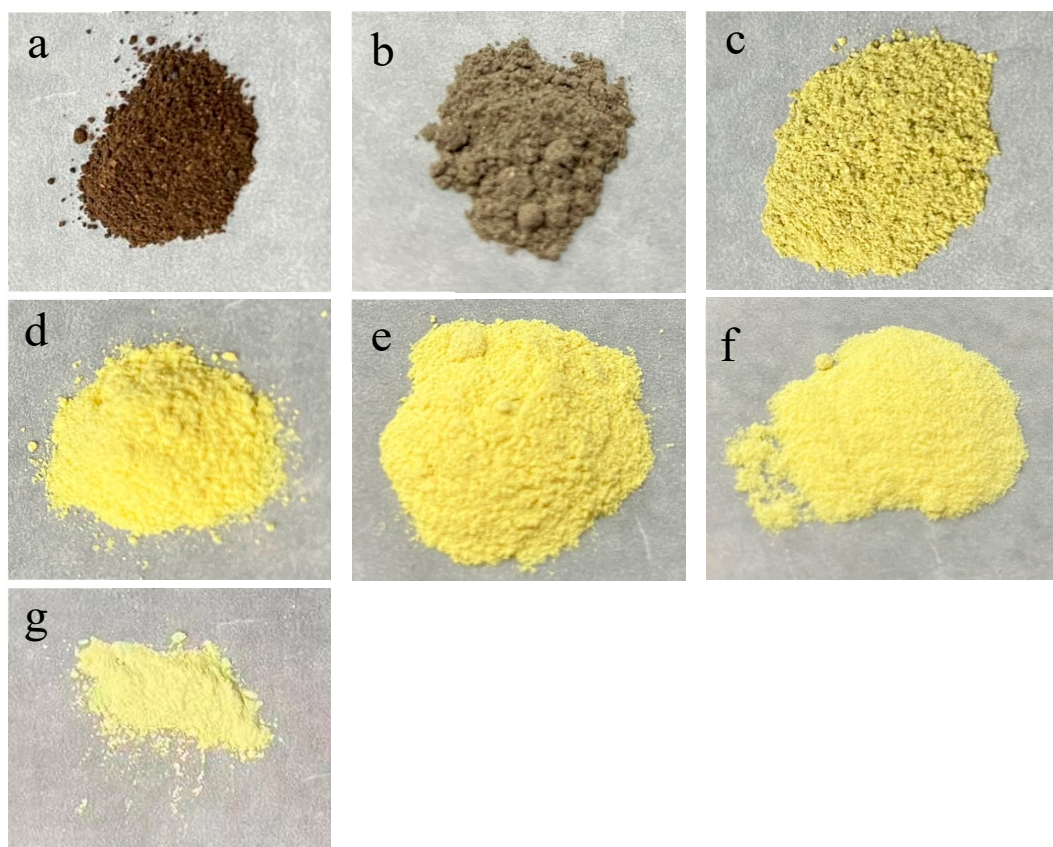

**Figure S1. A.** Images of all uncalcined samples after combustion (a: SnO<sub>2</sub>, b: Ce<sub>0.1</sub>Sn<sub>0.9</sub>O<sub>2</sub>, c: Ce<sub>0.5</sub>Sn<sub>0.5</sub>O<sub>2</sub>, d: Ce<sub>0.6</sub>Sn<sub>0.4</sub>O<sub>2</sub>, e: Ce<sub>0.7</sub>Sn<sub>0.3</sub>O<sub>2</sub>, f: Ce<sub>0.8</sub>Sn<sub>0.2</sub>O<sub>2</sub>, g: CeO<sub>2</sub>).

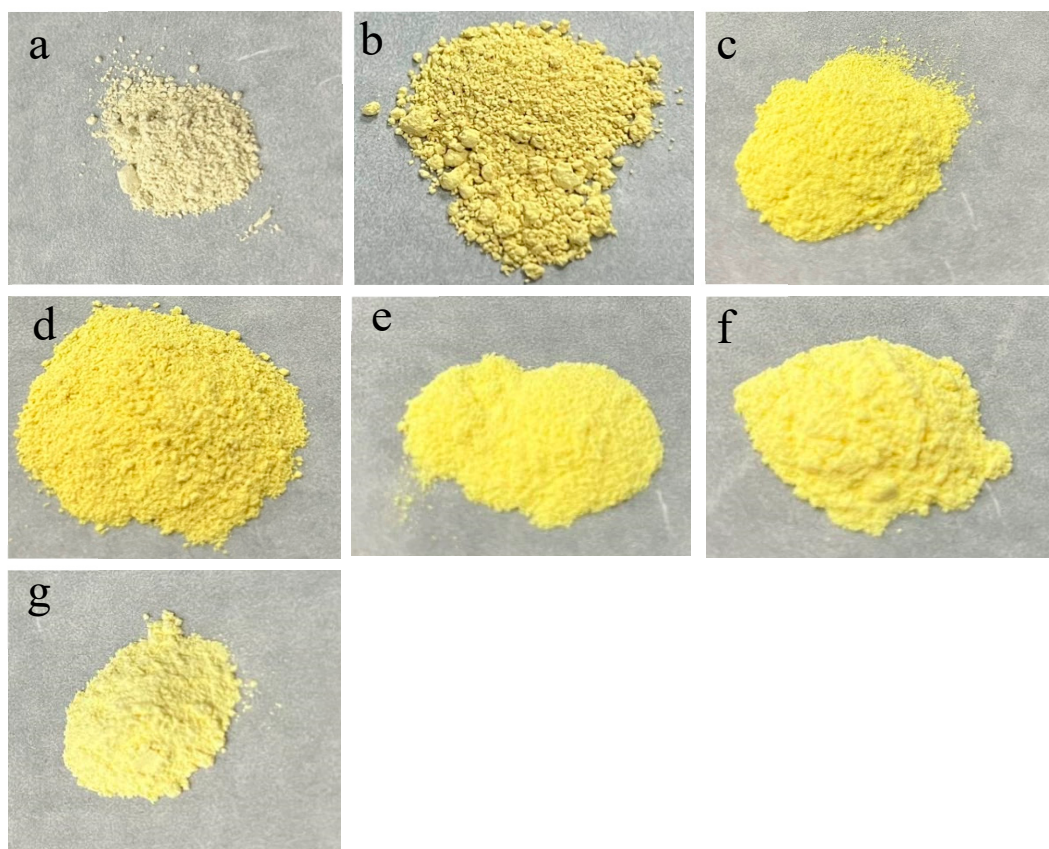

**Figure S1. B.** Image of all catalysts calcined at 500 °C for 6 h (a:  $\text{SnO}_2$ , b:  $\text{Ce}_{0.1}\text{Sn}_{0.9}\text{O}_2$ , c:  $\text{Ce}_{0.5}\text{Sn}_{0.5}\text{O}_2$ , d:  $\text{Ce}_{0.6}\text{Sn}_{0.4}\text{O}_2$ , e:  $\text{Ce}_{0.7}\text{Sn}_{0.3}\text{O}_2$ , f:  $\text{Ce}_{0.8}\text{Sn}_{0.2}\text{O}_2$ , g:  $\text{CeO}_2$ ).

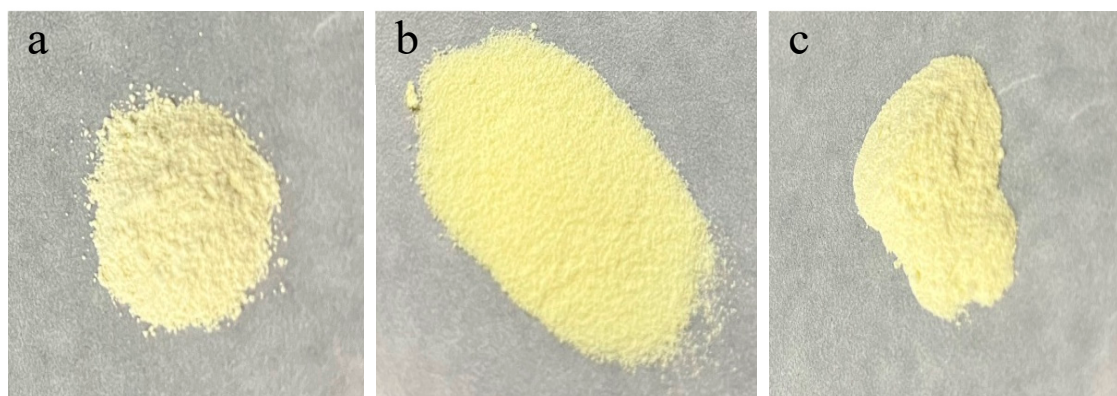

**Figure S1. C.** Image of all catalysts calcined at 800 °C for 4 h (a:  $\text{SnO}_2$ , b:  $\text{Ce}_{0.8}\text{Sn}_{0.2}\text{O}_2$ , c:  $\text{CeO}_2$ ).

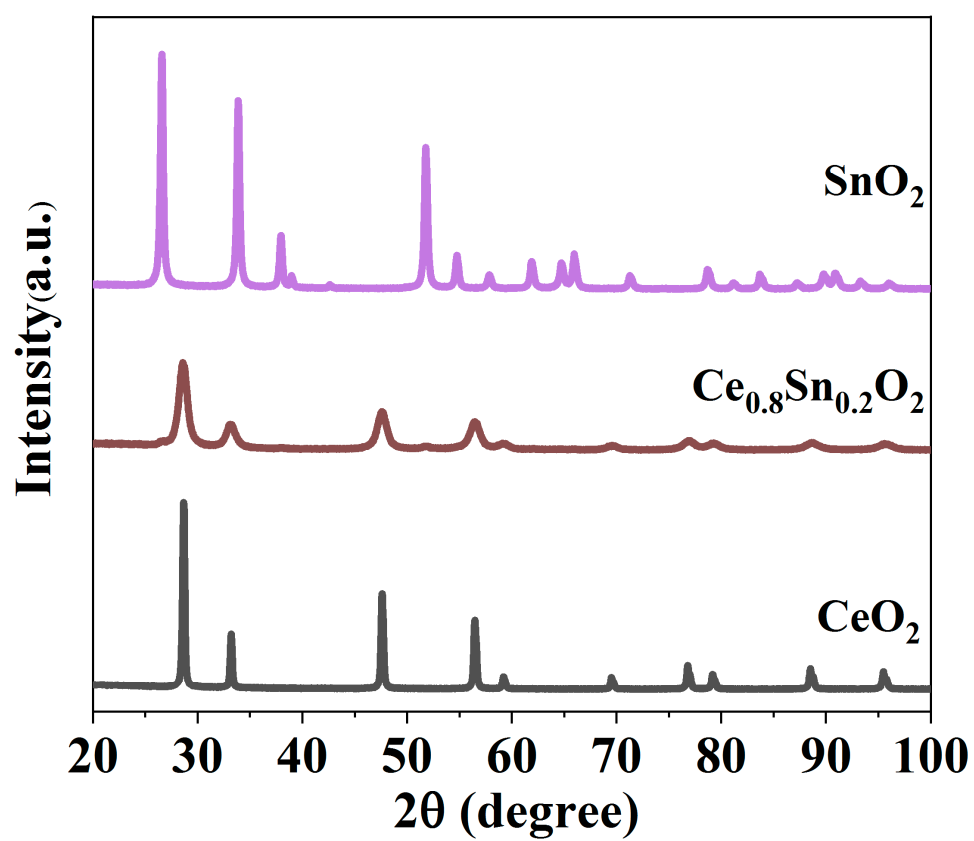

Figure S2. XRD patterns of the catalysts calcined at 800 °C.
